# Supplementary material
Source: PubMed Central journal article supplement (PMC8825992)
Supplement: mmc1.pdf [file mmc1.pdf]

## Supplemental information

### Mutations that adapt SARS-CoV-2

to mink or ferret do not increase

fitness in the human airway

Jie Zhou, Thomas P. Peacock, Jonathan C. Brown, Daniel H. Goldhill, Ahmed M.E. Elrefaey, Rebekah Penrice-Randal, Vanessa M. Cowton, Giuditta De Lorenzo, Wilhelm Furnon, William T. Harvey, Ruthiran Kugathasan, Rebecca Frise, Laury Baillon, Ria Lassaunière, Nazia Thakur, Giulia Gallo, Hannah Goldswain, I'ah Donovan-Banfield, Xiaofeng Dong, Nadine P. Randle, Fiachra Sweeney, Martha C. Glynn, Jessica L. Quantrill, Paul F. McKay, Arvind H. Patel, Massimo Palmarini, Julian A. Hiscox, Dalan Bailey, and Wendy S. Barclay

## Supplementary Figure S1. Amino acid differences between ferret and mink ACE2.

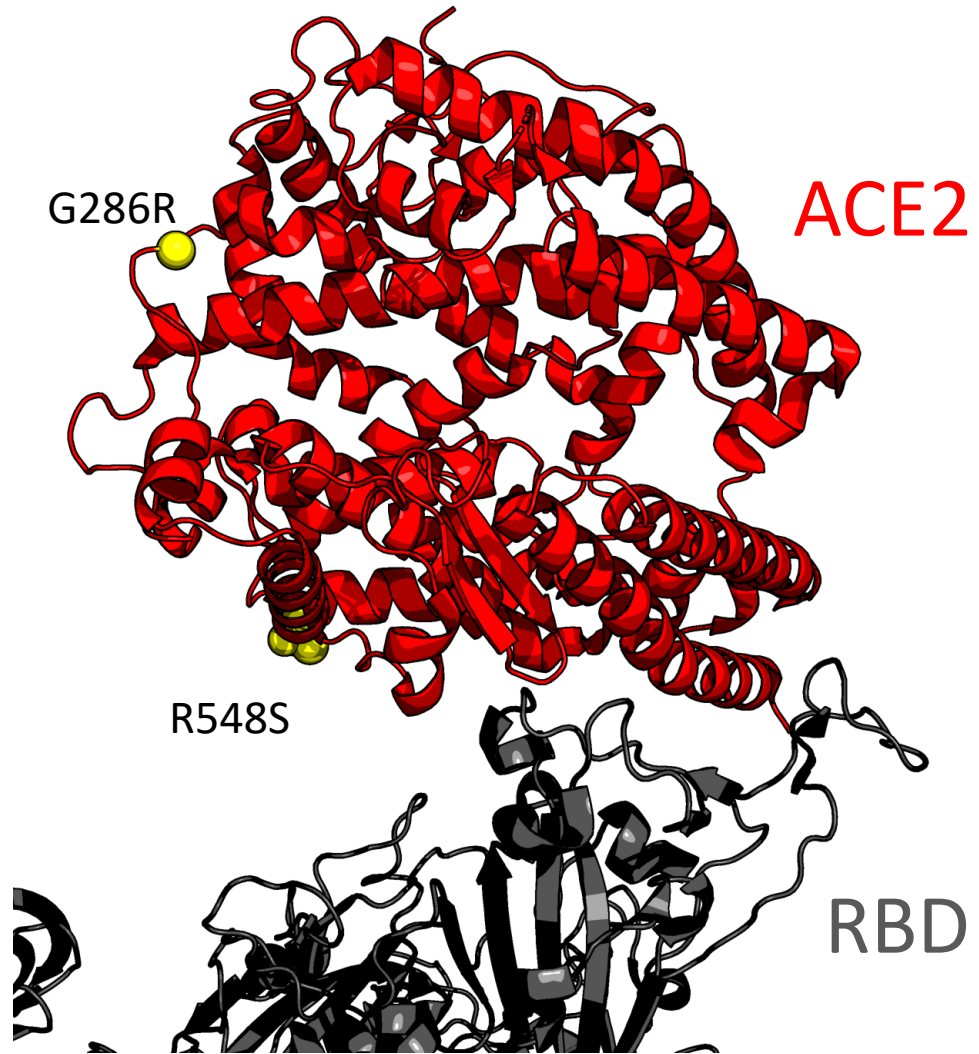

Differences between ferret and mink ACE2 are shown on the structure of human ACE/Spike structure PDB: 7A94(Benton et al., 2020). Related to Introduction.

## Supplementary Figure S2. Cell-cell fusion assays.

A

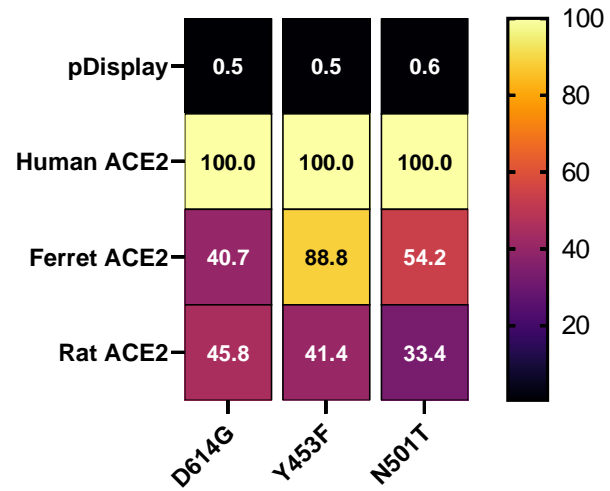

B

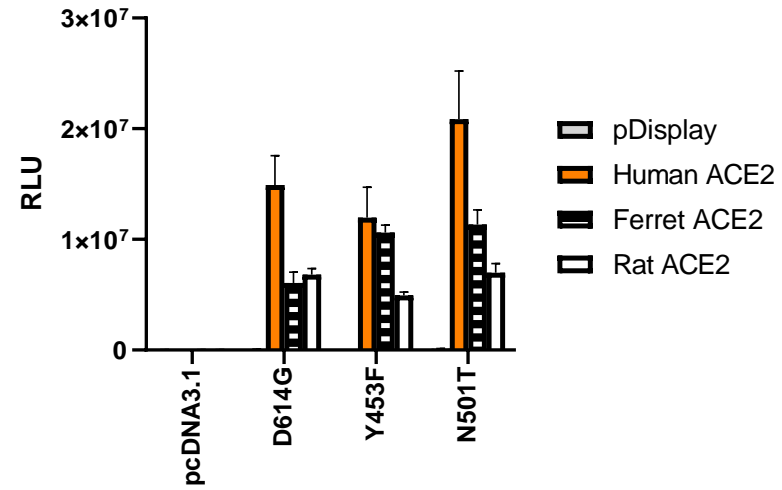

A, B) Cell-cell fusion assays of HEK 293Ts with rLUC-GFP1-7 transfected with the stated Spike protein and BHK-21 cells expressing the named ACE2 and rLUC-GFP 8-11.

Luminescence values shown normalised to human ACE2 (A) or as raw values (B). Related to Figure 3.
